# Supplementary material for: Effect of pore-directing agents and silanol groups in mesoporous silica nanoparticles as Nafion fillers on the performance of DMFCs
Source: Royal Society of Chemistry journal article supplement (doi:10.1039/c6ra24210c), 2016-01-01
Supplement: c6ra24210c1.pdf [file c6ra24210c1.pdf]

**Effect of pore-directing agents and silanol groups in  
mesoporous silica nanoparticles as Nafion fillers on the  
performance of DMFCs**

Ciao-Wei Yang<sup>a</sup>, Kuei-Hsien Chen<sup>b</sup>, and Soofin Cheng<sup>a,\*</sup>

<sup>a</sup>Department of Chemistry, National Taiwan University, Taipei 10617, Taiwan

<sup>b</sup>Institute of Atomic & Molecular Sciences, Academia Sinica, Taipei 10617, Taiwan

Supporting information

**Table S1** The average thicknesses ( $\mu\text{m}$ ) from five points of various membranes after drying at room temperature overnight.

| <b>Membrane</b>        | <b>Ave Thickness (<math>\mu\text{m}</math>)</b> | <b>Membrane</b>       | <b>Ave Thickness (<math>\mu\text{m}</math>)</b> |
|------------------------|-------------------------------------------------|-----------------------|-------------------------------------------------|
| <b>N117</b>            | 198 $\pm$ 2                                     | <b>recasting</b>      | 201 $\pm$ 10                                    |
| <b>1%-Ex-SBA-15n</b>   | 200 $\pm$ 7                                     | <b>1%-S-SBA-15n</b>   | 188 $\pm$ 5                                     |
| <b>2.5%-Ex-SBA-15n</b> | 201 $\pm$ 5                                     | <b>2.5%-S-SBA-15n</b> | 199 $\pm$ 2                                     |
| <b>5%-Ex-SBA-15n</b>   | 211 $\pm$ 6                                     | <b>5%-S-SBA-15n</b>   | 213 $\pm$ 9                                     |
| <b>10%-Ex-SBA-15n</b>  | 212 $\pm$ 7                                     | <b>10%-S-SBA-15n</b>  | 223 $\pm$ 7                                     |
| <b>15%-Ex-SBA-15n</b>  | 228 $\pm$ 11                                    | <b>15%-S-SBA-15n</b>  | 224 $\pm$ 6                                     |
| <b>20%-Ex-SBA-15n</b>  | 236 $\pm$ 12                                    | <b>20%-S-SBA-15n</b>  | 231 $\pm$ 5                                     |
| <b>1%-Ex-MSN</b>       | 177 $\pm$ 4                                     | <b>1%-S-MSN</b>       | 186 $\pm$ 4                                     |
| <b>2.5%-Ex-MSN</b>     | 199 $\pm$ 6                                     | <b>2.5%-S-MSN</b>     | 197 $\pm$ 9                                     |
| <b>5%-Ex-MSN</b>       | 195 $\pm$ 14                                    | <b>5%-S-MSN</b>       | 210 $\pm$ 8                                     |
| <b>10%-Ex-MSN</b>      | 210 $\pm$ 4                                     | <b>10%-S-MSN</b>      | 216 $\pm$ 4                                     |

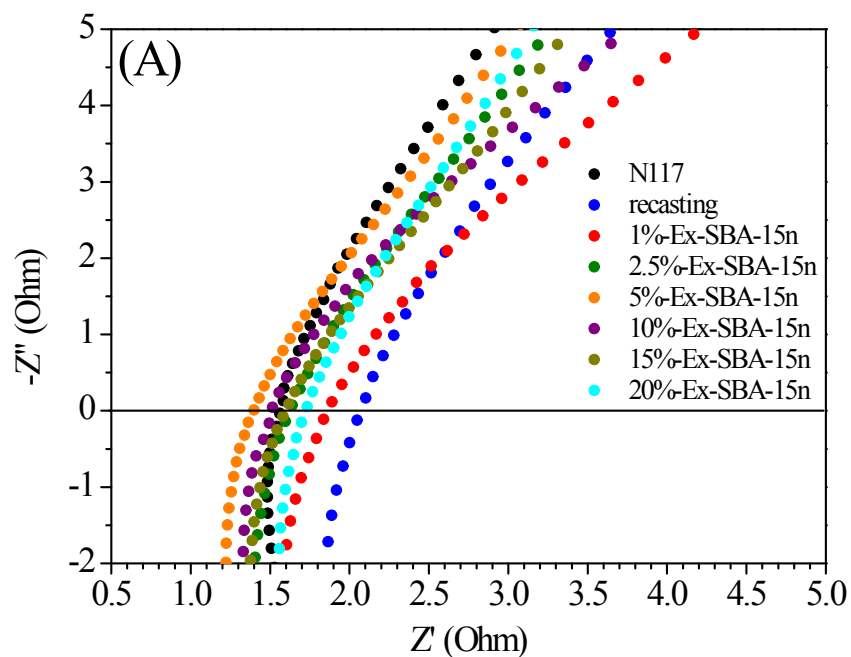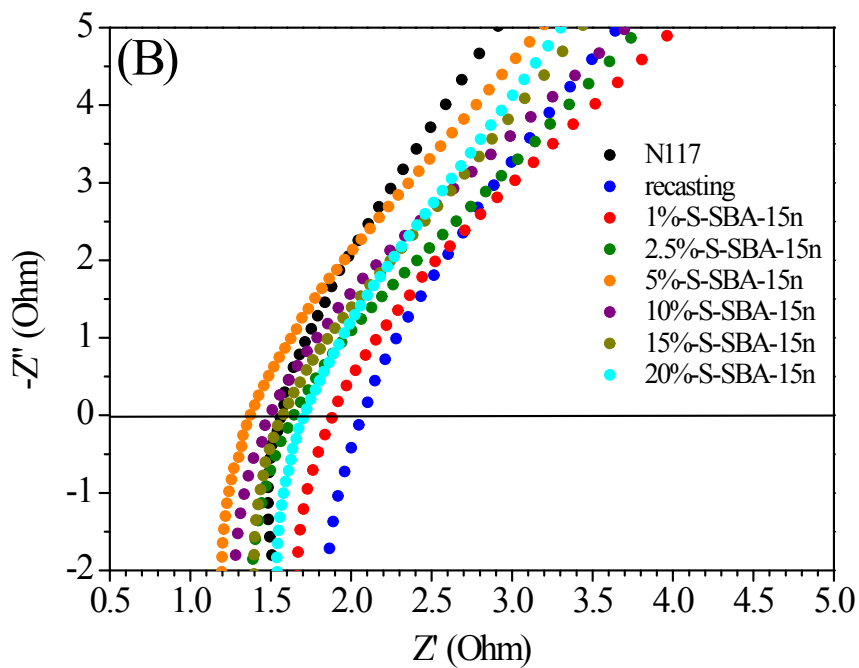

**Fig. S1** Nyquist plot of (A) x%-Ex-SBA-15n and (B) x%-S-SBA-15 with different loadings in comparison to those with Nafion<sup>®</sup>117 and recasting Nafion membranes at 60 °C and 90% percentage humidity.

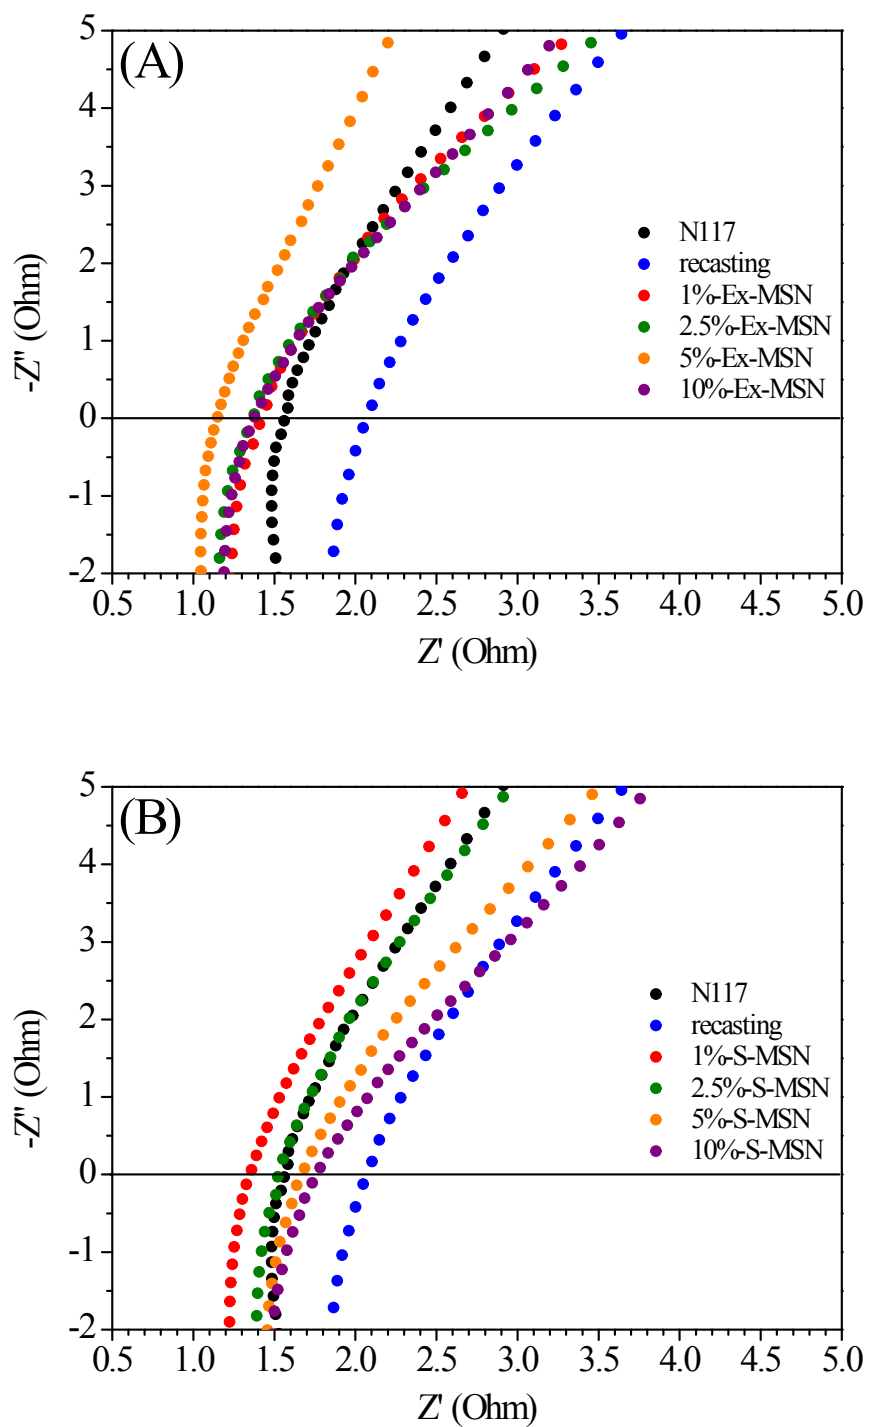

**Fig. S2** Nyquist plot of (A) x%-Ex-MSN and (B) x%-S-MSN with different loadings in comparison to those with Nafion<sup>®</sup>117 and recasting Nafion membranes at 60 °C and 90% percentage humidity.

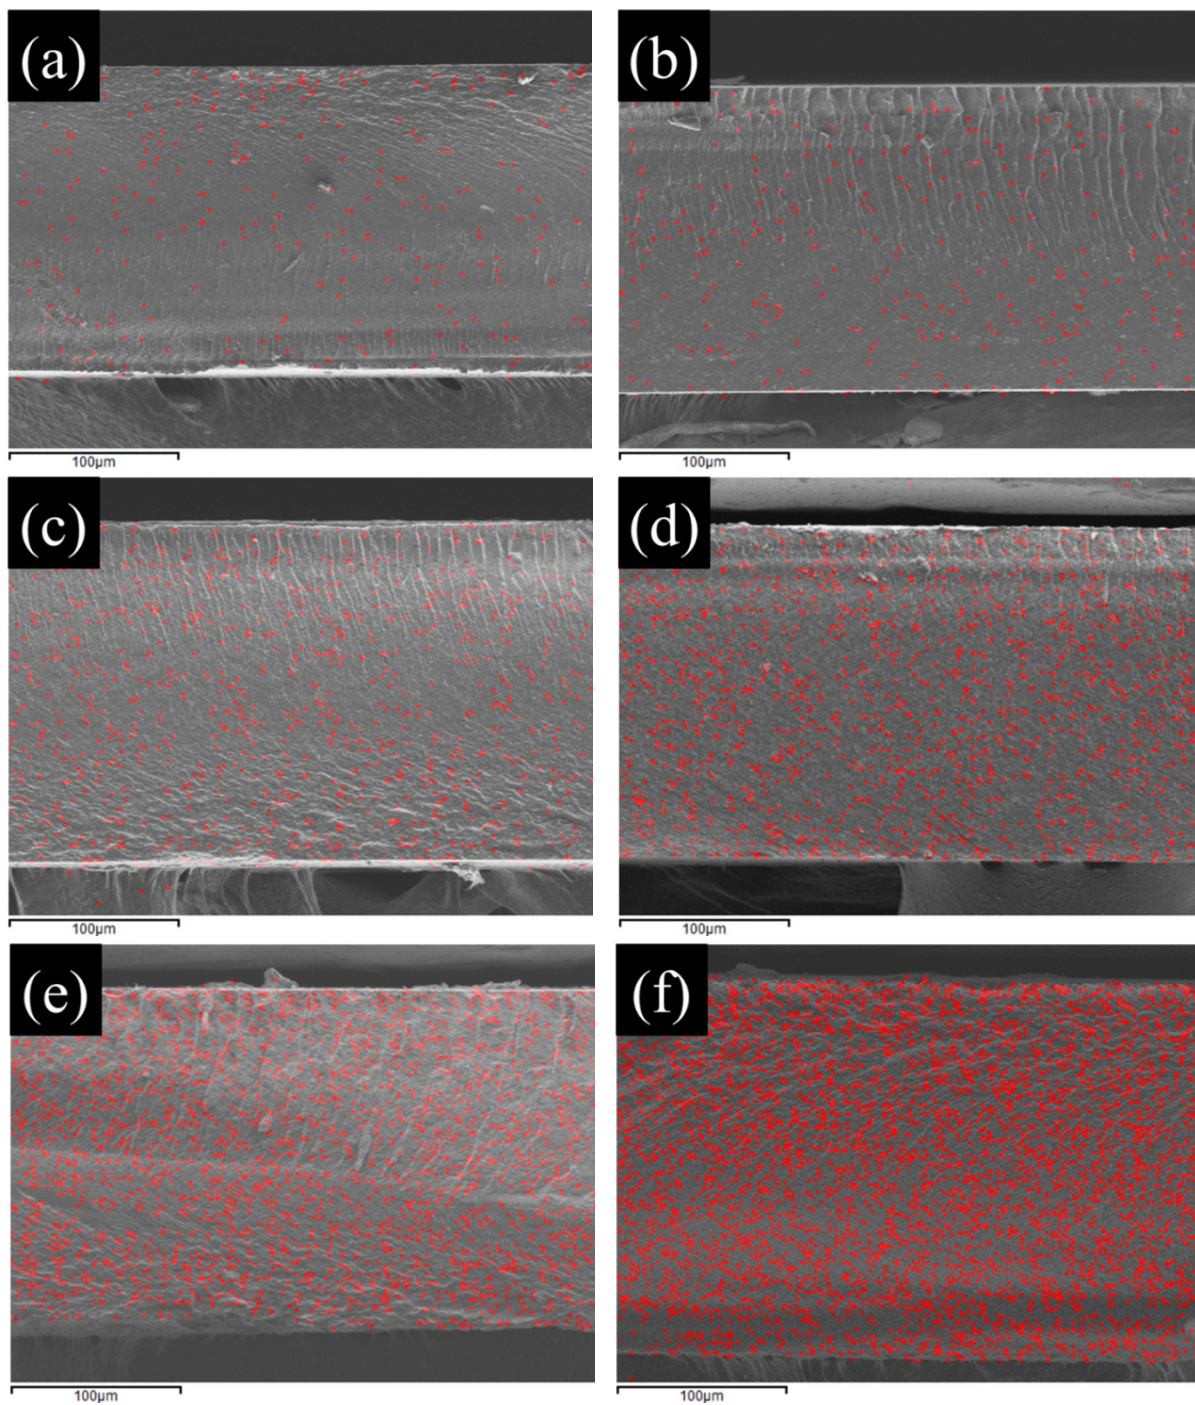

**Fig. S3** Mapping photographs of silicon in the cross-sections of composite membranes with different loadings of Ex-SBA-15n (a) 1%, (b) 2.5%, (c) 5%, (d) 10%, (e) 15% and (f) 20%.



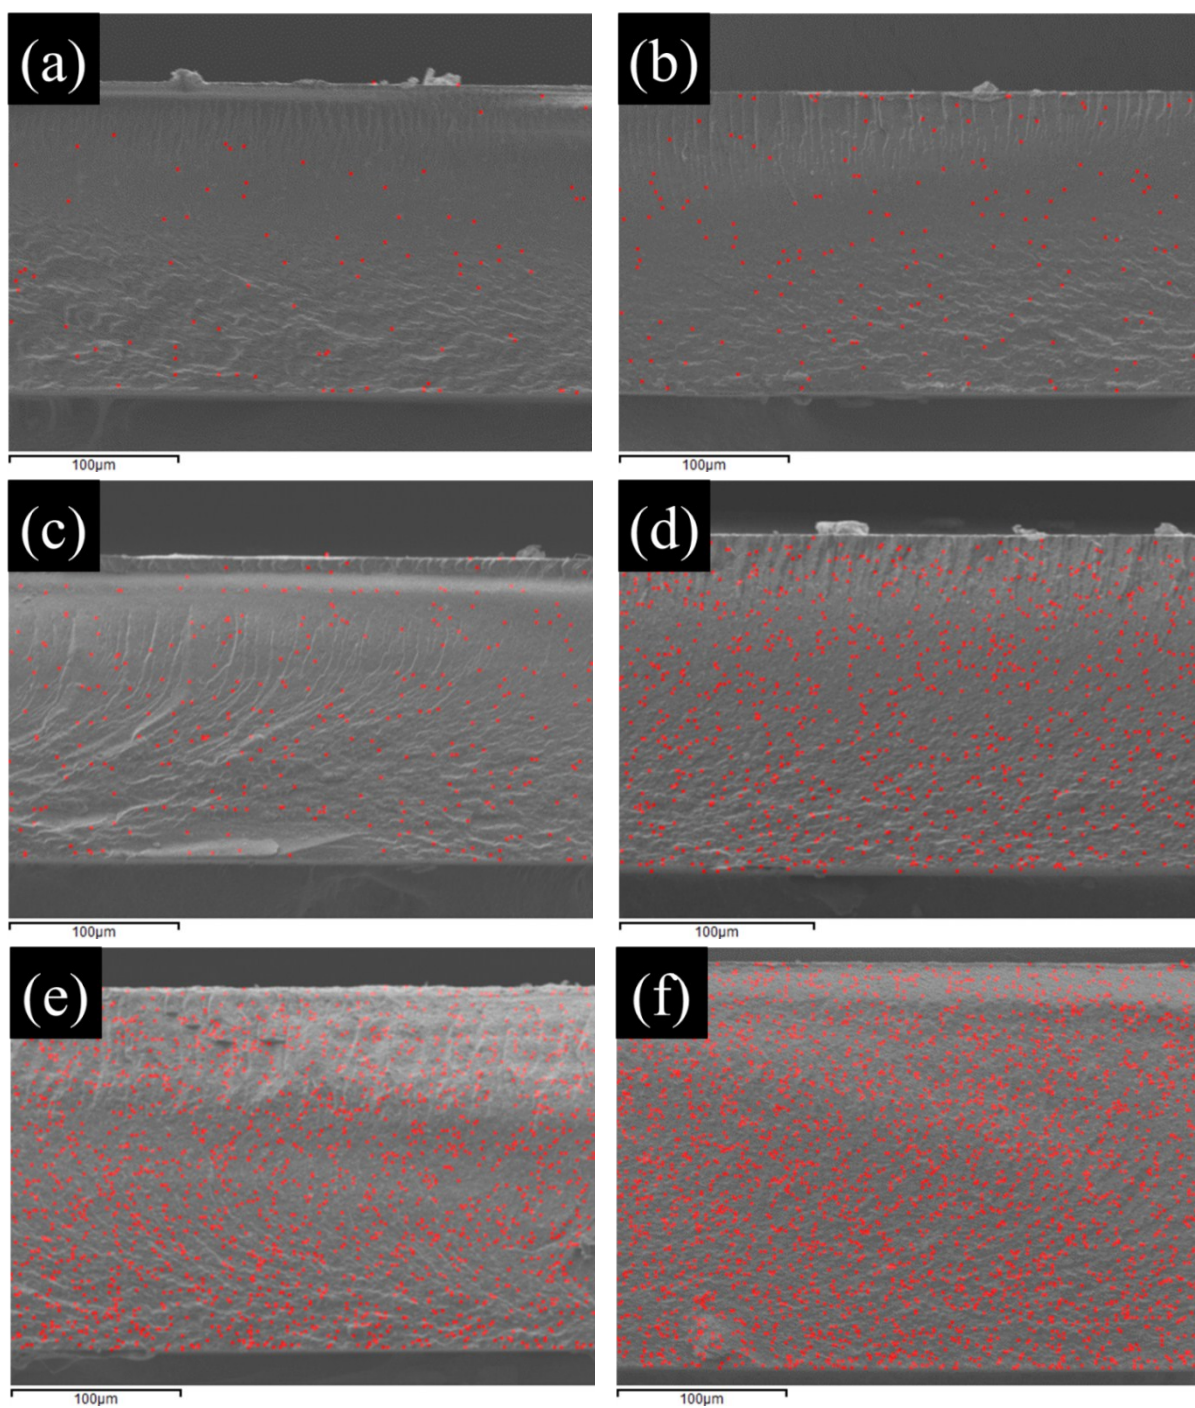

**Fig. S4** Mapping photographs of silicon in the cross-sections of composite membranes with different loadings of S-SBA-15n (a)1%, (b) 2.5%, (c) 5%, (d) 10%, (e) 15% and (f) 20%.

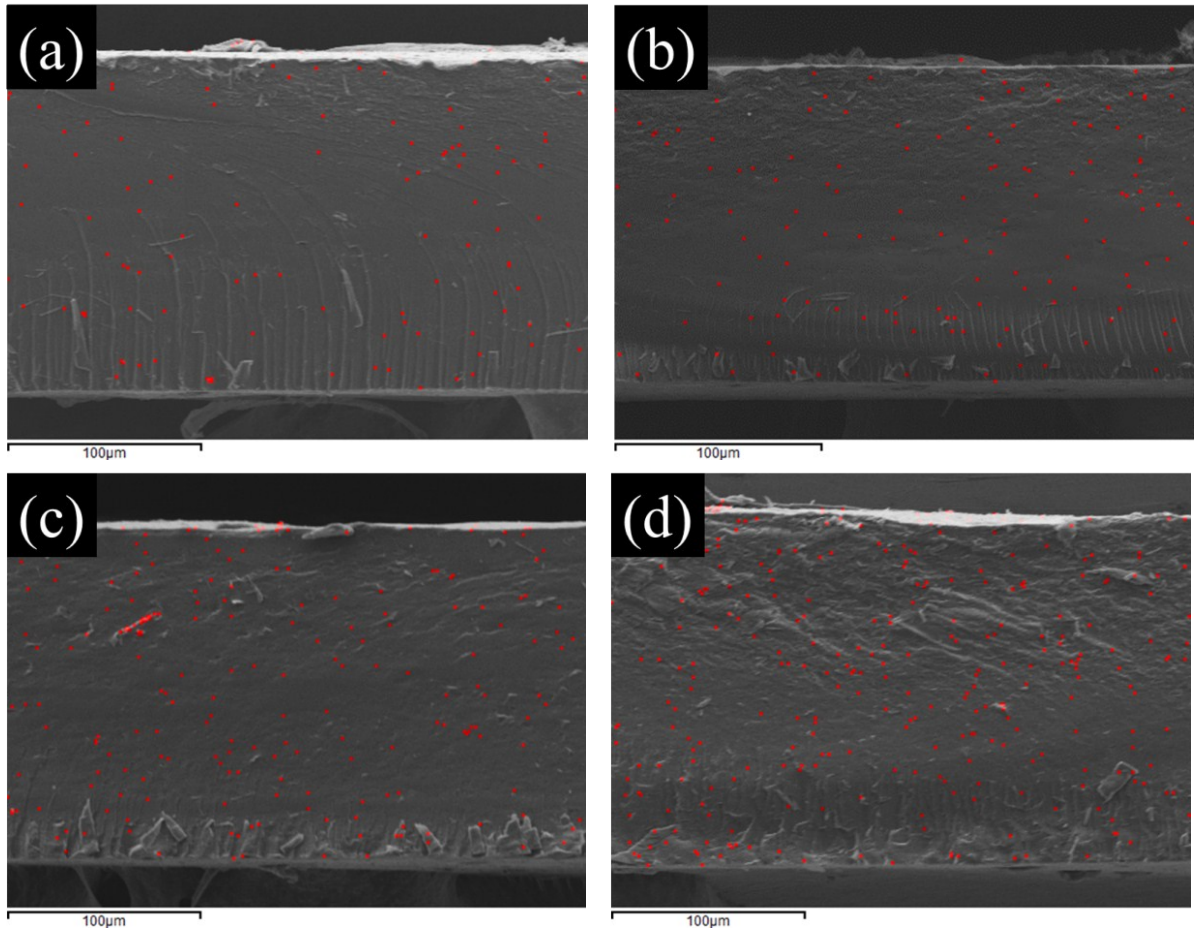

**Fig. S5** Mapping photographs of silicon in the cross-sections of composite membranes with different loadings of Ex-MSN (a) 1%, (b) 2.5%, (c) 5% and (d) 10%

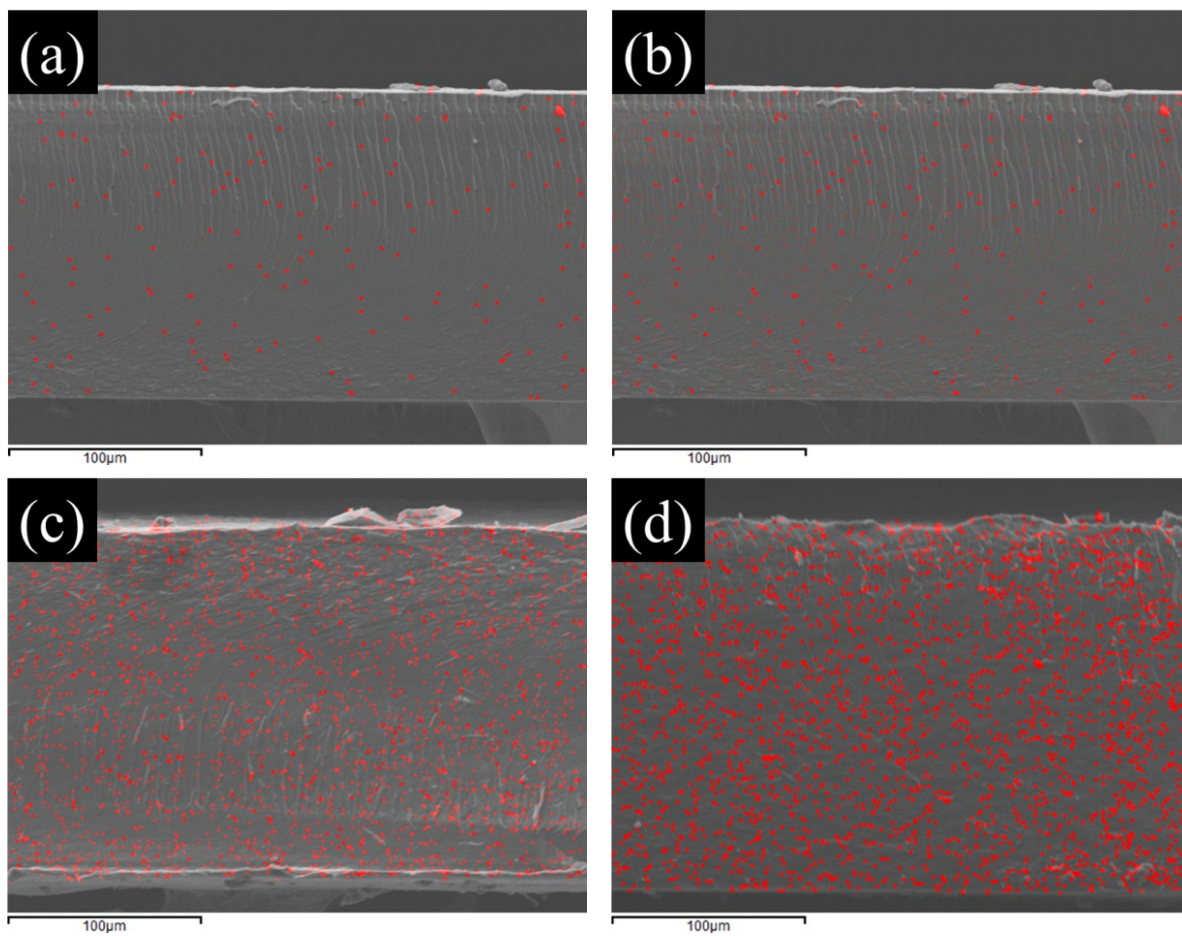

**Fig. S6** Mapping photographs of silicon in the cross-sections of composite membranes with different loadings of S-MSN (a) 1%, (b) 2.5%, (c) 5% and (d) 10%.



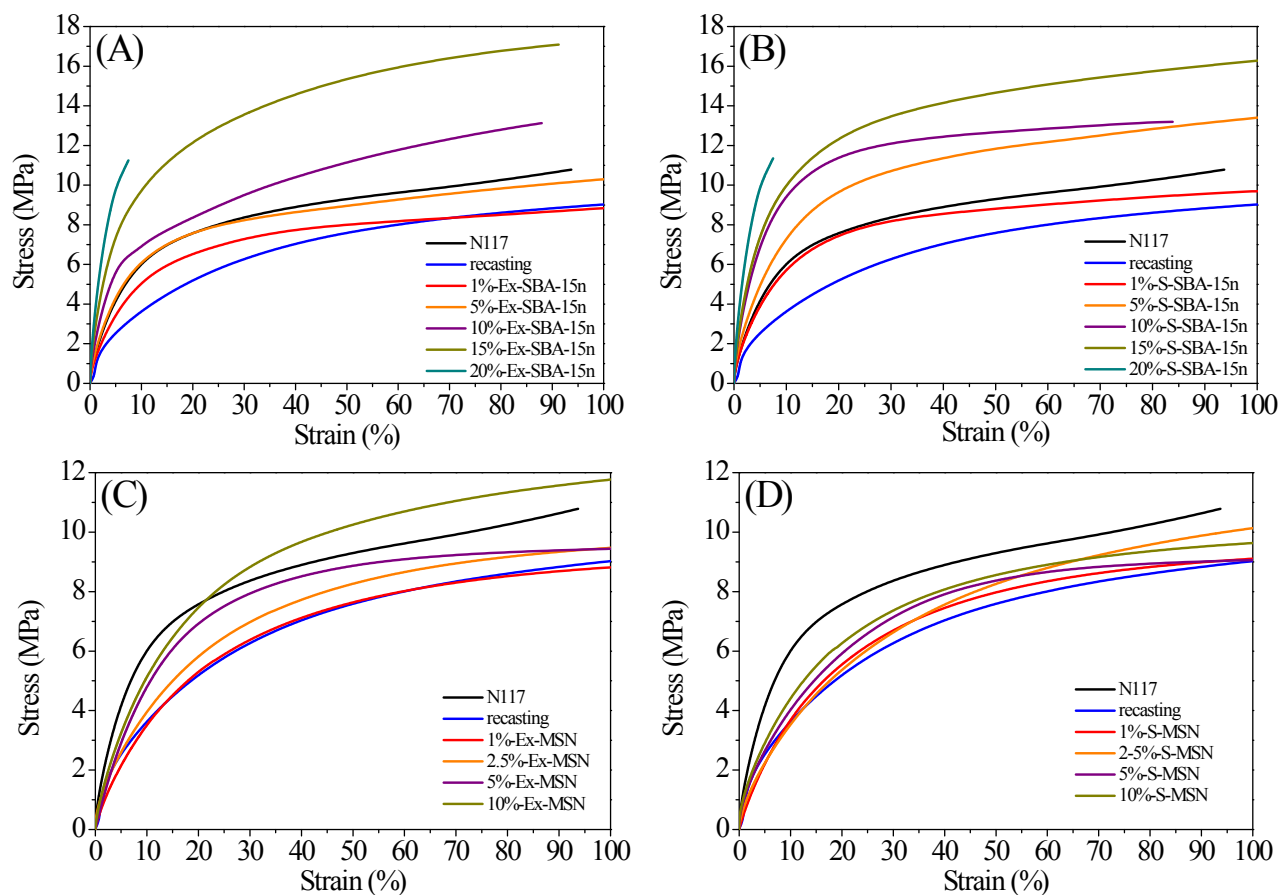

**Fig. S7** Stress–strain curves of Nafion membranes with different loadings of (A) Ex-SBA-15n, (B) S-SBA-15n, (C) Ex-MSN and (D) S-MSN in comparison to those of Nafion® 117 and recast Nafion membranes.

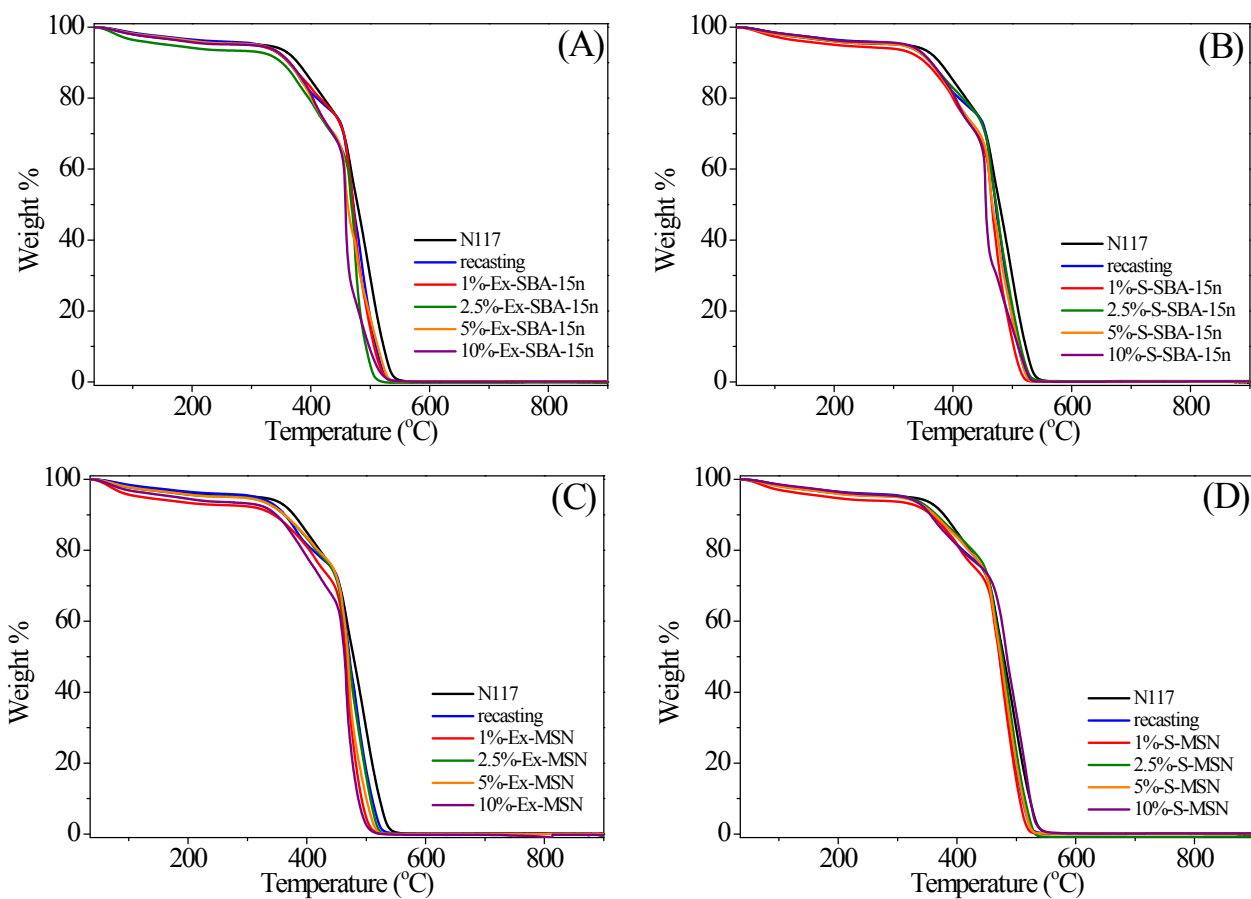

**Fig. S8** TGA curves of Nafion membranes with different loadings of (A) Ex-SBA-15n, (B) S-SBA-15n, (C) Ex-MSN and (D) S-MSN in comparison to those of Nafion<sup>®</sup> 117 and recast Nafion membranes.

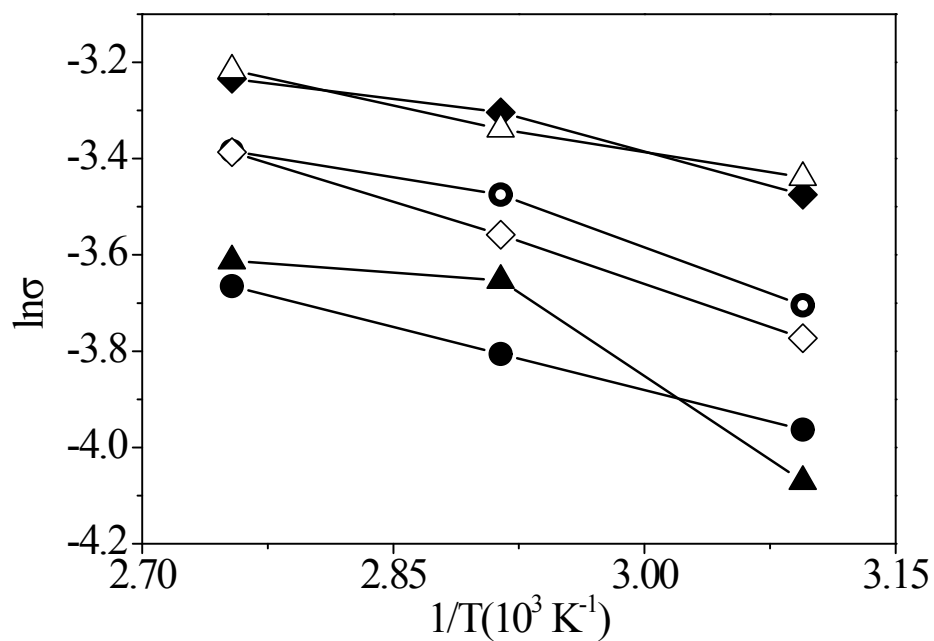

**Fig. S9** Temperature dependence of the proton conductivities for Nafion 117 (⊕), recasting Nafion membrane (⊗), 5%-Ex-SBA-15n (◇), 5%-S-SBA-15n (◆), 5%-Ex-MSN (□) and 5%-S-MSN (▲) composite membranes.
